# Supplementary material for: Tuning the structural, electronic and dynamical properties of Janus M4X3Y3 (M = Pd, Ni and Co; X,Y = S, Se and Te) monolayers: a DFT study
Source: Royal Society of Chemistry journal article supplement (doi:10.1039/d1cp01916c), 2021-01-01
Supplement: d1cp01916c2.pdf [file d1cp01916c2.pdf]

### Co-based Janus $M_4X_3Y_3$ ( $M = \text{Co}$ , $X, Y = \text{S}, \text{Se}, \text{Te}$ )

● Co ● S, Se, Te

**FM**

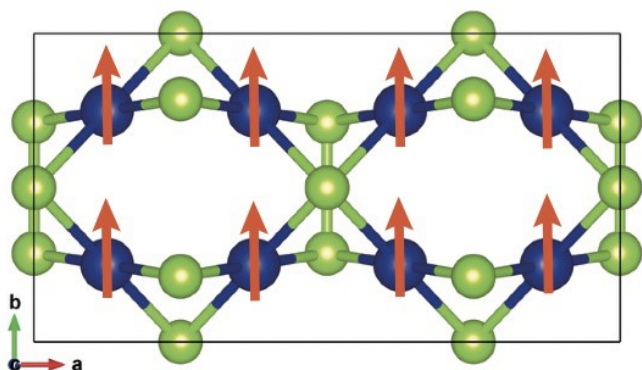

**AFM-Neel**

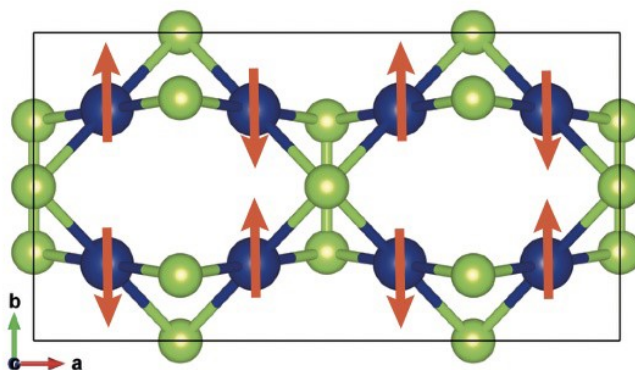

**AFM-Stripy**

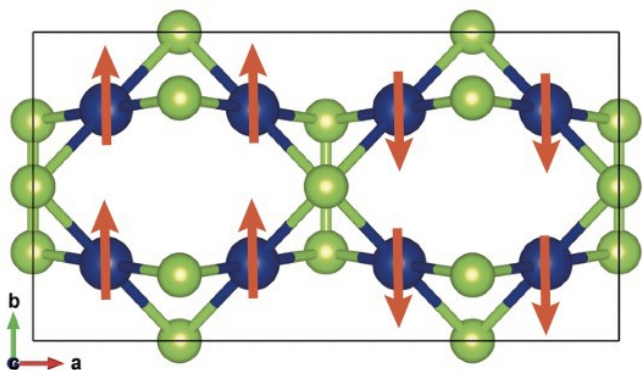

**AFM-Zigzag**

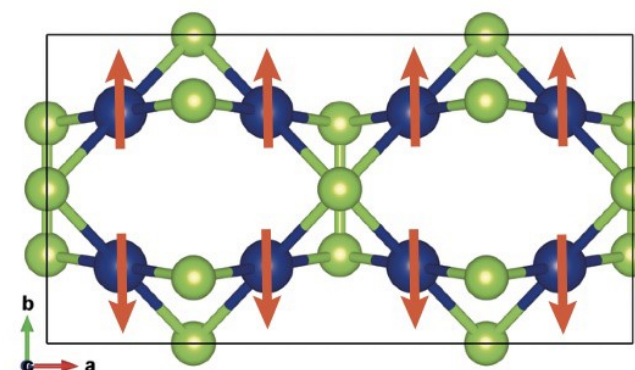

|                                     | NM         | FM        | AFM-Neel  | AFM-Stripy | AFM-Zigzag |
|-------------------------------------|------------|-----------|-----------|------------|------------|
| $\text{Co}_2\text{Se}_3$            | -105.5199  | -105.6860 | -105.5312 | -105.6325  | -105.5216  |
| $\text{Co}_4\text{Se}_3\text{S}_3$  | -109.6561  | -109.9013 | -109.6594 | -109.7948  | -109.7116  |
| $\text{Co}_4\text{Se}_3\text{Te}_3$ | -101.1370  | -101.3217 | -101.0765 | -101.2959  | -101.0763  |
| $\text{Co}_4\text{S}_3\text{Te}_3$  | -105.31120 | -105.5024 | -105.3111 | -105.3169  | -105.3105  |
