# Supplementary material for: Tuning the structural, electronic and dynamical properties of Janus M4X3Y3 (M = Pd, Ni and Co; X,Y = S, Se and Te) monolayers: a DFT study
Source: Royal Society of Chemistry journal article supplement (doi:10.1039/d1cp01916c), 2021-01-01
Supplement: d1cp01916c3.pdf [file d1cp01916c3.pdf]

# Supplementary Information

## Tuning structural, electronic, and dynamical properties of Janus $M_4X_3Y_3$ ( $M=\text{Pd, Ni, Co}$ , and $X, Y = \text{S, Se, Te}$ ) Monolayers : A DFT study

Ismail Eren<sup>†</sup> and Berna Akgenc<sup>\*,‡</sup>

<sup>†</sup>*Department of Physics, Izmir Institute of Technology, Izmir, 35430, Turkey.*

<sup>‡</sup>*Department of Physics, Kirklareli University, Kirklareli, Turkey*

E-mail: [berna.akgenc@klu.edu.tr](mailto:berna.akgenc@klu.edu.tr)

Due to itinerant Co d-electrons, we have also considered antiferromagnetic (AFM) orderings (i.e., AFM-Néel, AFM-Stripy, AFM-Zigzag, which are shown in Fig. S1 in the supplementary material). The comparison of minimum energies, which are obtained following structural optimizations including lattice constants for each magnetic states, implies that the lowest energy configuration is FM for Co-based Janus structure. The Co atom possesses the electronic configuration of  $3d^74s^2$ , and  $3d^7$  has unpaired electrons, which gives rise to the magnetic state of Co-based Janus structure. We should note that, favorable magnetic orientations (FM) for the considered Co-based Janus  $M_4X_3Y_3$  ( $M= \text{Co}$ , and  $X, Y = \text{S, Se, Te}$ ) monolayers which are written in Table are determined by DFT calculations.

Co-based Janus  $M_4X_3Y_3$  ( $M = \text{Co}$ ,  $X, Y = \text{S}, \text{Se}, \text{Te}$ )

● Co ● S, Se, Te

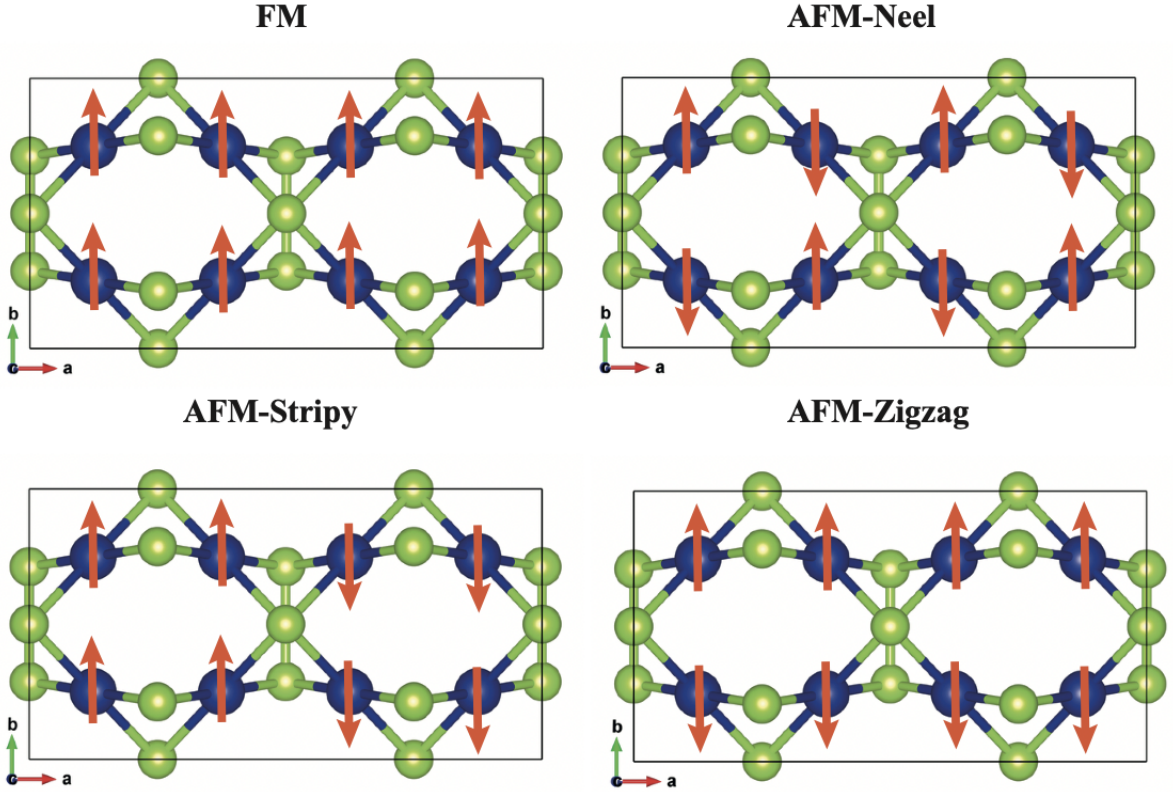

|                                     | NM         | FM        | AFM-Neel  | AFM-Stripy | AFM-Zigzag |
|-------------------------------------|------------|-----------|-----------|------------|------------|
| $\text{Co}_2\text{Se}_3$            | -105.5199  | -105.6860 | -105.5312 | -105.6325  | -105.5216  |
| $\text{Co}_4\text{Se}_3\text{S}_3$  | -109.6561  | -109.9013 | -109.6594 | -109.7948  | -109.7116  |
| $\text{Co}_4\text{Se}_3\text{Te}_3$ | -101.1370  | -101.3217 | -101.0765 | -101.2959  | -101.0763  |
| $\text{Co}_4\text{S}_3\text{Te}_3$  | -105.31120 | -105.5024 | -105.3111 | -105.3169  | -105.3105  |

Figure S1: Magnetic moment orientations (FM, AFM-Néel, AFM-Stripy, AFM-Zigzag). Up and down arrows indicate spin-up and spin-down orientations, respectively. The table shows minimum energy configuration.
